# Supplementary material
Source: ML conference proceedings conference paper supplement (https://openreview.net/forum?id=I19Zha9_rA6)
Supplement: supplementary_material [file attachment]

---

# FEASIBLE ADVERSARIAL ROBUST REINFORCEMENT LEARNING FOR UNDERSPECIFIED ENVIRONMENTS SUPPLEMENTARY MATERIALS

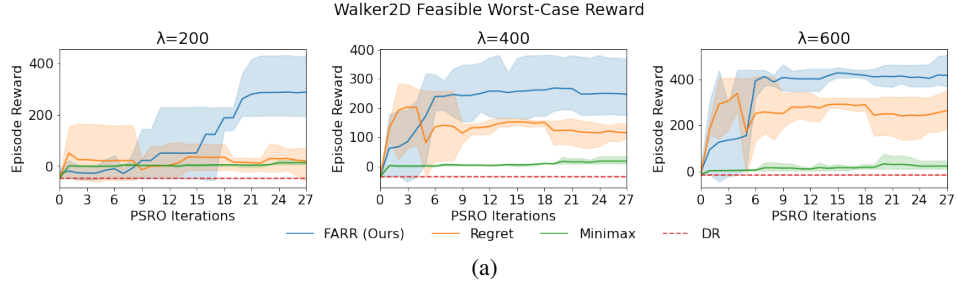

Figure 1: Worst-case MuJoCo Walker2D reward among task parameterizations in the feasible set  $\mathcal{F}^\lambda$  as a function of PSRO iterations for FARR and other baselines with multiple values of  $\lambda$ .

## A MUJoCo FEASIBLE SETS

For MuJoCo experiments, in order to measure each objective’s worst-case average episode reward among feasible tasks, we evaluate on a discrete approximation of  $\mathcal{F}^\lambda$ . In these environments,  $\Theta$  represents parameters of a beta distribution  $\mathbf{B}(\alpha, \beta)$ ,  $\alpha \in (0, 10]$ ,  $\beta \in (0, 10]$  sampled from each timestep to generate horizontal perturbing forces applied to the simulated robot. We consider a discretization of  $\Theta$  with 11 different values in  $[0.01, 10]$  for both  $\alpha$  and  $\beta$ . For each combination  $\theta = (\alpha, \beta)$ , we train 7 seeds of a RL best-response  $\mathbb{BR}(\theta)$  to completion using the same hyperparameters as the protagonist. The average final utility  $U_p(\mathbb{BR}(\theta), \theta)$  across seeds is then used to calculate  $\mathcal{F}^\lambda$  using equation (1). In Figure 2, for each environment, we show the 7-seed average  $U_p(\mathbb{BR}(\theta), \theta)$  for every value of  $\theta$  and the resulting feasible sets  $\mathcal{F}^\lambda$  (shown in green) that we evaluate robustness to for each value of  $\lambda$ .

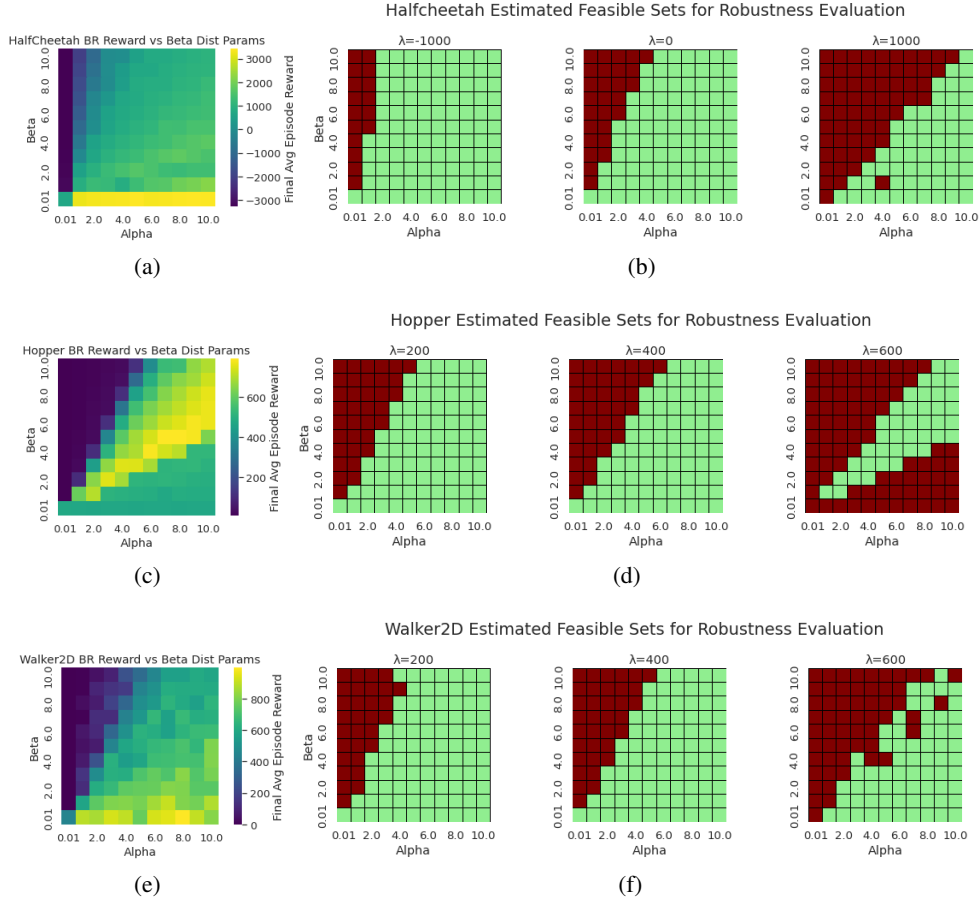

Figure 2: (a,c,e) Estimated values for  $U_p(\mathbb{BR}(\theta), \theta)$  across the two parameters  $\alpha$  and  $\beta$  that the adversary has control over. (b,d,f) The feasible sets  $\mathcal{F}^\lambda$  used for evaluation marked in green for each value of  $\lambda$ .

## B MUJoCo LEARNED ADVERSARY STRATEGIES

After running PSRO to completion, the output strategies are both a protagonist mixed strategy  $\sigma_p$  and an adversary mixed strategy  $\sigma_\theta$  that should jointly approximate a Nash equilibrium to each of the two-player zero-sum game objectives we optimize. In figures 3, 4, and 5, we display the distribution of  $\theta$  values induced by the final MuJoCo adversary mixed strategies  $\sigma_\theta$  for the minimax, regret, and FARR objectives. For each  $\lambda$  value considered, we overlay in shades of green the number of  $\text{IBR}(\theta)$  seeds used in measuring  $\mathcal{F}^\lambda$  that achieved a final average episode reward greater than or equal for  $\lambda$ .

Across all environments, the minimax adversary consistently selects the most difficult  $\theta$  values possible outside of any variations considered feasible with the  $\lambda$  values tested. In contrast, FARR mixes between  $\theta$  values both well inside of the feasible regions and at the edges where task variations are as challenging as possible while remaining feasible.

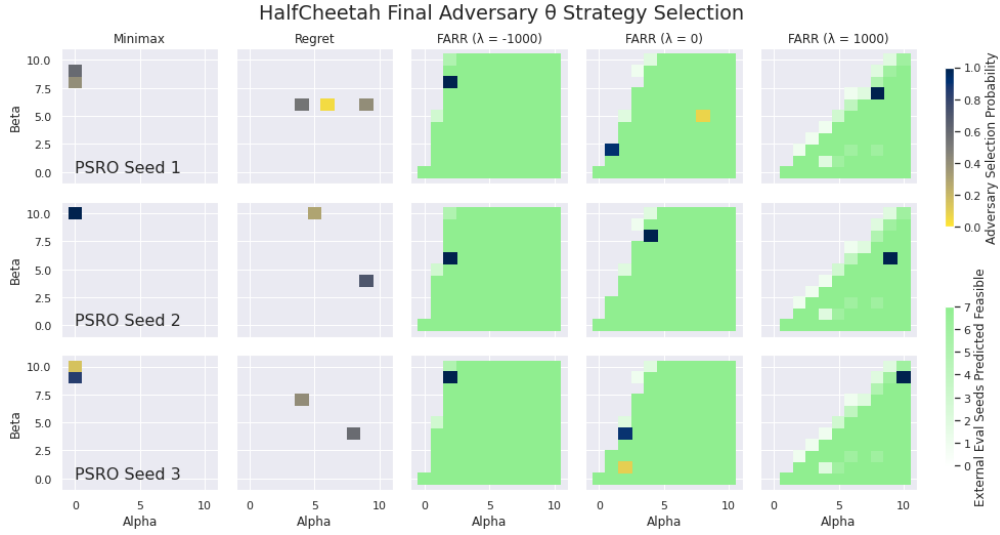

Figure 3: HalfCheetah  $\theta$  distributions induced by the final adversary PSRO mixed strategy  $\sigma_\theta$  for each objective.

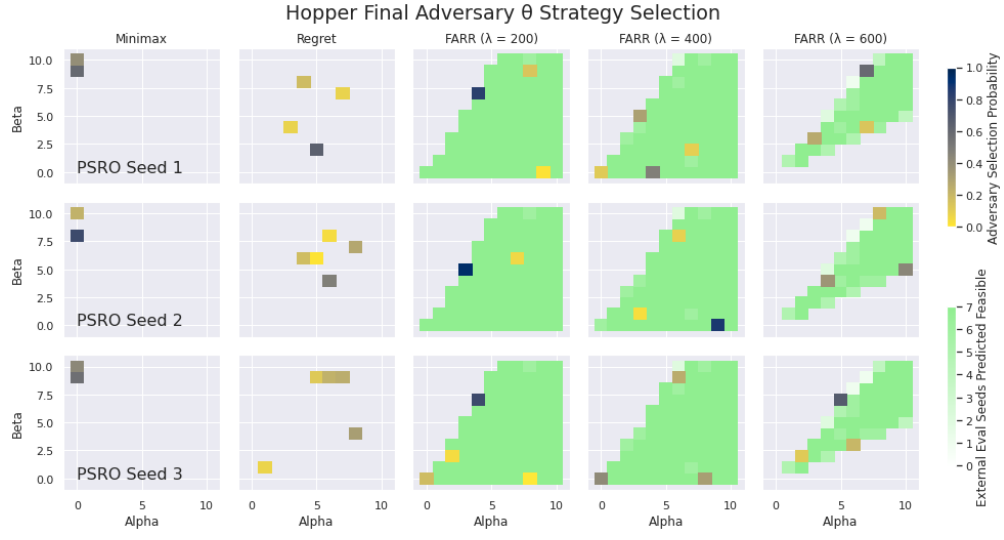

Figure 4: Hopper  $\theta$  distributions induced by the final adversary PSRO mixed strategy  $\sigma_\theta$  for each objective.

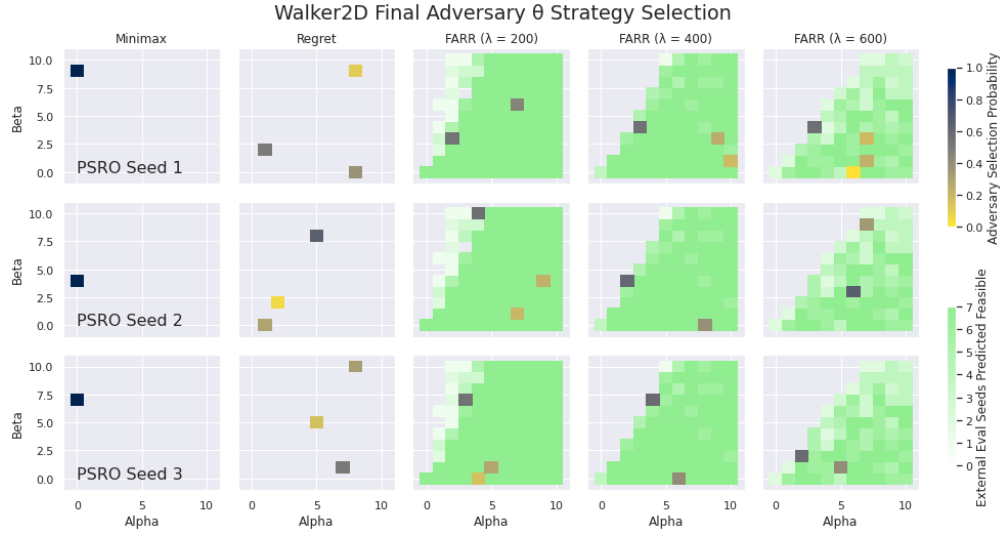

Figure 5: Walker2D  $\theta$  distributions induced by the final adversary PSRO mixed strategy  $\sigma_\theta$  for each objective.

## C PROPERTIES OF NASH EQUILIBRIA FOR THE FARR TRANSFORMED GAME

In this section we show that solving for Nash equilibria in the FARR transformed game will give the same result as solving for NE in a regular minimax robust RL game with the adversary strategy space already limited to only feasible strategies. The benefit of solving the FARR game is that the set of feasible adversary strategies does not need to be known a priori.

Define the set of  $\lambda$ -infeasible adversary strategies as  $\mathcal{I}^\lambda = \Theta \setminus \mathcal{F}^\lambda$ . Define the set of all possible protagonist strategies  $\pi_p$  as  $\Pi_p^*$ . For both protagonist utility functions  $U_p^\lambda$  and  $U_p$ , the adversary's utility function  $U_a^\lambda$  and  $U_a$  is the negative of the protagonist's,  $U_a^\lambda(\pi_p, \theta) = -U_p^\lambda(\pi_p, \theta)$  and  $U_a(\pi_p, \theta) = -U_p(\pi_p, \theta)$  for any  $\pi_p$  and  $\theta$ .

**Theorem 1.** *For sufficiently large  $C$ , a Nash equilibrium joint strategy  $\sigma_{\text{FARR}}^*$  of a FARR transformed game  $G_{\text{FARR}}$  with utility function  $U_p^\lambda$ , protagonist strategies  $\Pi_p^*$  and all adversary strategies  $\Theta$  is also a Nash equilibrium of a reduced game  $G_{\text{reduced}}$  with utility function  $U_p$ , protagonist strategies  $\Pi_p^*$ , and only  $\lambda$ -feasible adversary strategies  $\mathcal{F}^\lambda$ .*

*Proof.* Let  $C$  take a sufficiently large value greater than any utility achievable by the protagonist  $C > \max_{\pi_p, \theta} U_p(\pi_p, \theta)$ . Since  $U_a^\lambda(\pi_p, \theta') = -C$  when  $\theta' \in \mathcal{I}^\lambda$ , then for any  $\theta' \in \mathcal{I}^\lambda$ , any  $\theta \in \mathcal{F}^\lambda$ , and any  $\pi_p \in \Pi_p^*$ ,  $U_a^\lambda(\pi_p, \theta') < -U_p(\pi_p, \theta) = U_a^\lambda(\pi_p, \theta)$ . It follows, as long as  $\mathcal{F}^\lambda$  is nonempty, that for all  $\theta' \in \mathcal{I}^\lambda$  there exists an adversary strategy  $\theta \in \mathcal{F}^\lambda$  which achieves higher adversary utility against every  $\pi_p \in \Pi_p^*$ , thus all  $\lambda$ -infeasible adversary strategies  $\theta' \in \mathcal{I}^\lambda$  are strictly dominated in the FARR transformed game.

If all  $\theta' \in \mathcal{I}^\lambda$  are strictly dominated then they are not in the support of any Nash equilibrium for  $G_{\text{FARR}}$ . Furthermore, it is possible to remove strategies  $\theta' \in \mathcal{I}^\lambda$  through iterated elimination of strictly dominated strategies (IESDS) to reduce  $G_{\text{FARR}}$  to  $G_{\text{reduced}}$  since the adversary strategy set for  $G_{\text{reduced}}$  is  $\Theta \setminus \mathcal{I}^\lambda = \mathcal{F}^\lambda$  and for all  $\theta \in \mathcal{F}^\lambda$  and  $\pi_p \in \Pi_p^*$ :  $U_p^\lambda(\pi_p, \theta) = U_p(\pi_p, \theta)$ . If  $G_{\text{reduced}}$  is an outcome of IESDS from  $G_{\text{FARR}}$ , then if  $\sigma_{\text{FARR}}^*$  is a NE of  $G_{\text{FARR}}$ , it is also an NE of  $G_{\text{reduced}}$ . □

By employing a penalty  $C$  rather than directly pruning infeasible strategies from the PSRO restricted game, the FARR objective can be defined without consideration to the mechanics of any specific algorithm like PSRO. The FARR objective can potentially be optimized with two-player zero-sum game methods other than PSRO as well, though exploring the use of more optimization methods is left to future work.

## D SELECTING VALUES FOR $\lambda$

FARR is most applicable when the appropriate value for  $\lambda$  can be derived from problem requirements. For instance,  $\lambda$  would ideally be set to the lowest average return that an optimal agent would receive across task variations in deployment. This value could come from the environment definition, where doable tasks provide a minimum level of return if accomplished. Alternatively,  $\lambda$  could be chosen by anticipating the maximum difficulty of task variations that would be seen at test-time or on which robust performance is important to the practitioner.

In the case where an appropriate value of  $\lambda$  is completely unknown and cannot be derived from problem requirements, in a low-dimensional task variation space, manually tuning the adversary's capabilities without FARR may be appropriate. In a complex, high-dimensional task variation space, searching for a useful  $\lambda$  may be easier than a direct search over the space of adversary legal strategy sets because  $\lambda$  presents a single variable to tune, rather than a large number of legal parameter ranges or complex conditional constraints between adversary-specified parameters that may need to be defined. In this work, we consider the case where  $\lambda$  can be derived from problem requirements.

## E PSRO COMPARISON WITH SELF-PLAY

In Lava World, for each of the two-player zero-sum game objectives, we compare PSRO to self-play in which the protagonist, adversary, and evaluator  $\pi_e^\theta$  continuously train together. For all self-play agents, we train with PPO to enable stochastic policies like PSRO is able to output. Regret self-play matches the original PAIRED algorithm from Dennis et al. (2020).

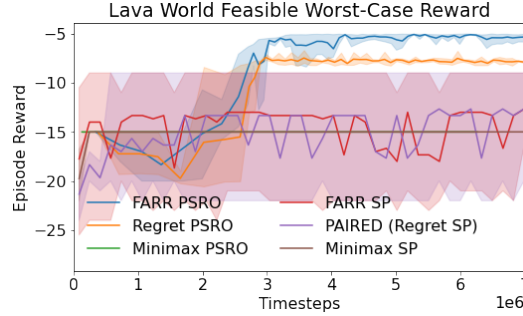

Figure 6: Worst-case average episode reward among goals in  $\mathcal{F}^\lambda$  vs timesteps collected for each two-player zero-sum game objective optimized with both PSRO and PPO Self-Play.

Although self-play may potentially yield competitive performance in some scenarios, unlike PSRO, it lacks any guarantees of converging to an approximate Nash equilibrium in two-player zero-sum partially-observable Markov or extensive-form games. Seen in Figure 6, we see that self-play for both FARR and PAIRED fails to converge, reaching a maximum feasible-space worst-case average reward of -9 as agent policies cycle and learn to represent nearly deterministic strategies during most points in training. The NE for Lava World requires a mixed-strategy in which the adversary samples a high-entropy (non-uniform) distribution of hidden goals. The degenerate solution to Minimax is reached by both algorithms.

## F ENVIRONMENT DETAILS

### F.1 LAVA WORLD

In the Lava World grid environment, the protagonist uses discrete actions to move in each of the 4 cardinal directions. For observations, the protagonist receives a one-hot encoding of its current location, and the protagonist does not observe the goal location. The adversary strategy space  $\Theta$  is to define the hidden goal location and consists of every grid cell location in the environment’s 5x5 grid with the exception of the protagonist’s fixed starting location.

The protagonist receives a reward of -1 in each timestep that it does not reach the hidden goal location suggested by the adversary and -15 if it moves into a lava cell, even if the lava cell was a goal. An episode ends after either 20 timesteps elapse or the goal is reached.

### F.2 MUJoCo ENVIRONMENTS

The MuJoCo environments use the Mujoco physics engine (Todorov et al., 2012) and are modified versions of the perturbed robotic control environments originally presented in Pinto et al. (2017).

In each environment variation (HalfCheetah, Hopper, Walker2D), a max episode duration of 200 timesteps is imposed, and the proportion of time remaining in the range  $[0, 1]$  is appended to each task’s original observation. We use the continuous action space variants of each task.

The adversary strategy space  $\Theta$  consists of continuous  $\alpha$  and  $\beta$  parameters in the range  $(0, 10]$  for a beta distribution  $\mathbf{B}(\alpha, \beta)$  used to generate horizontal perturbing forces sampled and applied to the robot’s torso every timestep. Each timestep, a new horizontal force  $F \in [-F_{\max}, F_{\max}]$ ,  $F = X(2F_{\max}) - F_{\max}$  is generated where  $X \sim \mathbf{B}(\alpha, \beta)$  and  $F_{\max} = 100$ .

When discretizing values of  $\theta = (\alpha, \beta)$  for evaluation purposes to measure a policy’s performance across values in  $\Theta$  or  $\mathcal{F}^\lambda$ , we use  $\alpha, \beta \in \{0.01, 1.0, 2.0, 3.0, 4.0, 5.0, 6.0, 7.0, 8.0, 9.0, 10.0\}$ .

## G TRAINING DETAILS

Protagonist RL training details are provided below for each environment. Policies used to estimate  $\mathbb{BR}(\theta)$  for a given  $\theta$  use the same training procedure and parameters as the protagonist. Like Dennis et al. (2020), we train protagonist policies on the easier-to-learn unmodified environment reward  $U_p$  rather than our two-player game objective  $U_p^\lambda$  because the only component of the game utility that the protagonist can affect is  $U_p$ . A protagonist best-response that maximizes  $U_p$  also maximizes  $U_p^\lambda$ . Critically, we still calculate  $U_p^\lambda$  in the PSRO empirical payoff matrix  $U_\lambda^\Pi$  and use  $U_\lambda^\Pi$  to calculate the meta-game NE strategy  $\sigma = (\sigma_p, \sigma_\theta)$ .

### G.1 LAVA WORLD

We train Lava World protagonist RL policies using DDQN Van Hasselt et al. (2016). All Lava World protagonist RL policies are stopped training after either 150,000 timesteps are collected or once performance plateaus (average episode return doesn’t improve by 0.5 over 20,000 timesteps and a minimum of 80,000 timesteps is collected). Lava World DDQN hyperparameters are presented below. Our RL code was built using the RLlib framework Liang et al. (2018), and any hyperparameters not specified are the version 1.0.1 defaults. We use an infeasibility penalty of  $C = 50$ .

|                                             |                                                          |
|---------------------------------------------|----------------------------------------------------------|
| algorithm                                   | DDQN Van Hasselt et al. (2016)                           |
| circular replay buffer size                 | 50,000                                                   |
| prioritized experience replay               | No                                                       |
| total rollout experience gathered each iter | 8 steps                                                  |
| learning rate                               | 0.007                                                    |
| batch size                                  | 1024                                                     |
| optimizer                                   | Adam (Kingma & Ba, 2014)                                 |
| TD-error loss type                          | MSE                                                      |
| target network update frequency             | every 4,000 steps                                        |
| MLP layer sizes                             | [256, 256]                                               |
| activation function                         | tanh                                                     |
| discount factor $\gamma$                    | 1.0                                                      |
| exploration $\epsilon$                      | Linearly annealed from 0.5 to 0.01 over 20,000 timesteps |

Table 1: Lava World protagonist DDQN hyperparameters

|                                    |                            |
|------------------------------------|----------------------------|
| algorithm                          | PPO Schulman et al. (2017) |
| GAE $\lambda$                      | 0.9                        |
| entropy coeff                      | 0.007                      |
| clip param                         | 0.276                      |
| KL target                          | 3e-4                       |
| KL coeff                           | 0.0016                     |
| learning rate                      | 5e-4                       |
| train batch size                   | 8192                       |
| SGD minibatch size                 | 64                         |
| num SGD epochs on each train batch | 40                         |
| shared policy and value networks   | No                         |
| value function clip param          | 10                         |
| MLP layer sizes                    | [256, 256]                 |
| activation function                | Tanh                       |
| discount factor $\gamma$           | 1.0                        |

Table 2: Lava World PPO self-play protagonist hyperparameters

---

|                                    |                            |
|------------------------------------|----------------------------|
| algorithm                          | PPO Schulman et al. (2017) |
| GAE $\lambda$                      | 0.95                       |
| entropy coeff                      | 0.006                      |
| clip param                         | 0.292                      |
| KL target                          | 0.092                      |
| KL coeff                           | 0.168                      |
| learning rate                      | 3e-4                       |
| train batch size                   | 8192                       |
| SGD minibatch size                 | 64                         |
| num SGD epochs on each train batch | 30                         |
| shared policy and value networks   | No                         |
| value function clip param          | 100                        |
| MLP layer sizes                    | [256, 256]                 |
| activation function                | Tanh                       |
| discount factor $\gamma$           | 1.0                        |

Table 3: Lava World PPO self-play adversary hyperparameters

In PSRO, to calculate the payoff matrix  $U_{\lambda}^{\Pi}$ , we estimate  $U_p(\pi_p, \theta)$  for each pairing of player policies  $\pi_p \in \Pi_p$  and  $\theta \in \Pi_{\theta}$  using a single rollout because both Lava World environment dynamics and evaluation DDQN policies are deterministic. The normal-form meta-game Nash Equilibrium over  $U_{\lambda}^{\Pi}$  is calculated using 2000 iterations of Fictitious Play (Brown, 1951). Calculating the meta-game NE typically takes a second or less of wall-time compute.

During PSRO evaluation, we measure the performance of the protagonist meta-game mixed strategy  $\sigma_p$ , in which a new protagonist policy  $\pi_p \sim \sigma_p$  is sampled at the beginning of each episode.

In self-play, the adversary is trained as a single-step agent via PPO. For simplicity, we keep the same network architecture for all self-play agents, and the adversary observes a constant vector of zeros.



## G.2 MuJoCo

We train MuJoCo environment protagonist RL policies using PPO (Schulman et al., 2017). Each PPO model consists of an MLP followed by an LSTM with shared weights between the policy and value function, branching into final output layers after the LSTM. PPO hyperparameters for each MuJoCo environment are presented below. Any hyperparameters not specified are the RLlib version 1.0.1 defaults. We use an infeasibility penalty of  $C = 1e6$ .

|                                       |                            |
|---------------------------------------|----------------------------|
| algorithm                             | PPO Schulman et al. (2017) |
| GAE $\lambda$                         | 0.9                        |
| entropy coeff                         | 0.01                       |
| clip param                            | 0.001                      |
| KL target                             | 0.004                      |
| KL coeff                              | 0.522                      |
| learning rate                         | 5e-4                       |
| train batch size                      | 4096                       |
| SGD minibatch size                    | 64                         |
| num SGD epochs on each train batch    | 5                          |
| shared policy and value networks      | Yes                        |
| value function loss coeff             | 0.001                      |
| value function clip param             | 100                        |
| continuous action range               | [-1.0, 1.0] for each dim   |
| MLP layer sizes                       | [32]                       |
| activation function                   | Tanh                       |
| LSTM cell size                        | 32                         |
| LSTM max sequence length              | 20                         |
| discount factor $\gamma$              | 0.99                       |
| RL policy training stopping condition | 7e6 timesteps              |

Table 4: HalfCheetah PPO hyperparameters

|                                       |                            |
|---------------------------------------|----------------------------|
| algorithm                             | PPO Schulman et al. (2017) |
| GAE $\lambda$                         | 0.9                        |
| entropy coeff                         | 0.001                      |
| clip param                            | 0.002                      |
| KL target                             | 0.036                      |
| KL coeff                              | 0.013                      |
| learning rate                         | 7e-4                       |
| train batch size                      | 4096                       |
| SGD minibatch size                    | 32                         |
| num SGD epochs on each train batch    | 5                          |
| shared policy and value networks      | Yes                        |
| value function loss coeff             | 0.001                      |
| value function clip param             | 10                         |
| continuous action range               | [-1.0, 1.0] for each dim   |
| MLP layer sizes                       | [64, 64]                   |
| activation function                   | Tanh                       |
| LSTM cell size                        | 32                         |
| LSTM max sequence length              | 20                         |
| discount factor $\gamma$              | 0.99                       |
| RL policy training stopping condition | 6e6 timesteps              |

Table 5: Hopper PPO hyperparameters

---

|                                       |                            |
|---------------------------------------|----------------------------|
| algorithm                             | PPO Schulman et al. (2017) |
| GAE $\lambda$                         | 0.95                       |
| entropy coeff                         | 0.0                        |
| clip param                            | 0.014                      |
| KL target                             | 0.005                      |
| KL coeff                              | 0.007                      |
| learning rate                         | 9e-4                       |
| train batch size                      | 1024                       |
| SGD minibatch size                    | 64                         |
| num SGD epochs on each train batch    | 10                         |
| shared policy and value networks      | Yes                        |
| value function loss coeff             | 1e-4                       |
| value function clip param             | 1000                       |
| continuous action range               | [-1.0, 1.0] for each dim   |
| MLP layer sizes                       | [32]                       |
| activation function                   | Tanh                       |
| LSTM cell size                        | 32                         |
| LSTM max sequence length              | 20                         |
| discount factor $\gamma$              | 1.0                        |
| RL policy training stopping condition | 6e6 timesteps              |

Table 6: Walker2D PPO hyperparameters

In PSRO, to calculate the payoff matrix  $U_{\lambda}^{\Pi}$ , we estimate  $U_p(\pi_p, \theta)$  for each pairing of player policies  $\pi_p \in \Pi_p$  and  $\theta \in \Pi_{\theta}$  using 100 rollouts as perturbed MuJoCo environment transition dynamics are stochastic. The normal-form meta-game Nash Equilibrium over  $U_{\lambda}^{\Pi}$  is also calculated using 2000 iterations of Fictitious Play.

Although PSRO convergence guarantees are not provided for continuous-action environments, in McAleer et al. (2021), McAleer et al. (2022), and our own experiments, PSRO reliably produces meta-game NE mixed strategies that are empirically difficult for an opponent to exploit.

## H COMPUTATIONAL COSTS

Experiments were performed on a local computer with 128 logical CPU-cores, 4 RTX 3090 GPUs, and 512GB of RAM. Due to small network sizes and comparably high overhead of CPU-based environments, logging, and other tasks, most experiments were performed without GPU acceleration. All individual training runs for a given player against a fixed opponent took 5 CPU-cores each. Lava world experiments individually ran for roughly 8 to 24 hours each, while MuJoCo experiments individually ran for roughly 72 hours each.

## I CODE

A GitHub link for our experiment code will be provided under the MIT license in an updated version of this work.

Our code is written on top of the RLlib framework (Liang et al., 2018) and uses environments built using the MuJoCo physics engine (Todorov et al., 2012), both of which are open-source and available under the Apache-2.0 Licence.

## REFERENCES

- George W. Brown. Iterative solution of games by fictitious play. *Activity analysis of production and allocation*, pp. 374–376, 1951.
- Michael Dennis, Natasha Jaques, Eugene Vinitzky, Alexandre Bayen, Stuart Russell, Andrew Critch, and Sergey Levine. Emergent complexity and zero-shot transfer via unsupervised environment design. *arXiv preprint arXiv:2012.02096*, 2020.

- 
- Diederik P Kingma and Jimmy Ba. Adam: A method for stochastic optimization. *arXiv preprint arXiv:1412.6980*, 2014.
- Eric Liang, Richard Liaw, Robert Nishihara, Philipp Moritz, Roy Fox, Ken Goldberg, Joseph Gonzalez, Michael Jordan, and Ion Stoica. Rllib: Abstractions for distributed reinforcement learning. In *International Conference on Machine Learning*, pp. 3053–3062. PMLR, 2018.
- Stephen McAleer, John Banister Lanier, Kevin A Wang, Pierre Baldi, and Roy Fox. Xdo: A double oracle algorithm for extensive-form games. *Advances in Neural Information Processing Systems*, 34:23128–23139, 2021.
- Stephen McAleer, Kevin Wang, Marc Lanctot, John Lanier, Pierre Baldi, and Roy Fox. Anytime optimal psro for two-player zero-sum games. *arXiv preprint arXiv:2201.07700*, 2022.
- Lerrel Pinto, James Davidson, Rahul Sukthankar, and Abhinav Gupta. Robust adversarial reinforcement learning. In *International Conference on Machine Learning*, pp. 2817–2826. PMLR, 2017.
- John Schulman, Filip Wolski, Prafulla Dhariwal, Alec Radford, and Oleg Klimov. Proximal policy optimization algorithms. *arXiv preprint arXiv:1707.06347*, 2017.
- Emanuel Todorov, Tom Erez, and Yuval Tassa. Mujoco: A physics engine for model-based control. In *2012 IEEE/RSJ International Conference on Intelligent Robots and Systems*, pp. 5026–5033. IEEE, 2012. doi: 10.1109/IROS.2012.6386109.
- Hado Van Hasselt, Arthur Guez, and David Silver. Deep reinforcement learning with double q-learning. In *AAAI conference on artificial intelligence*, volume 30, 2016.
